# Supplementary material for: Affordable and robust phenotyping framework to analyse root system architecture of soil-grown plants
Source: bioRxiv or medRxiv preprint supplement (doi:10.1101/573139), 2019-03-10

Supplemental Figure S1

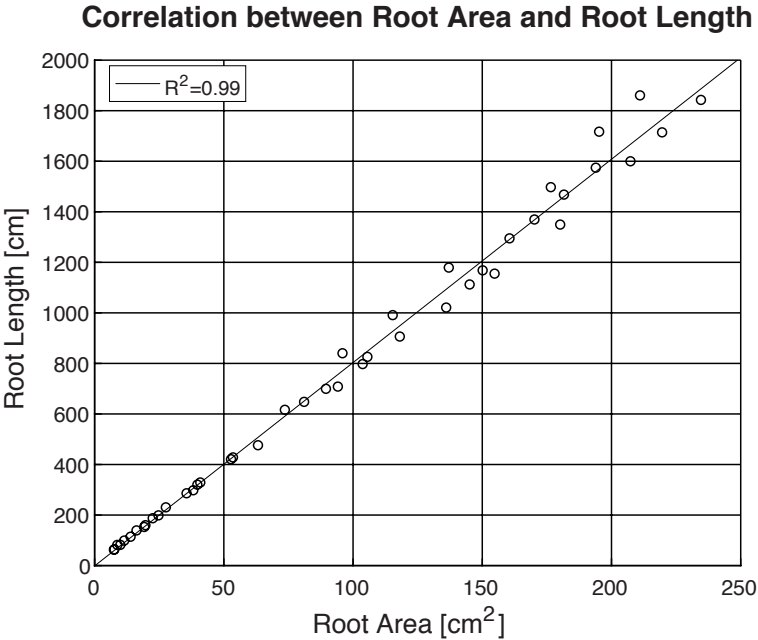

Supplemental Figure S2

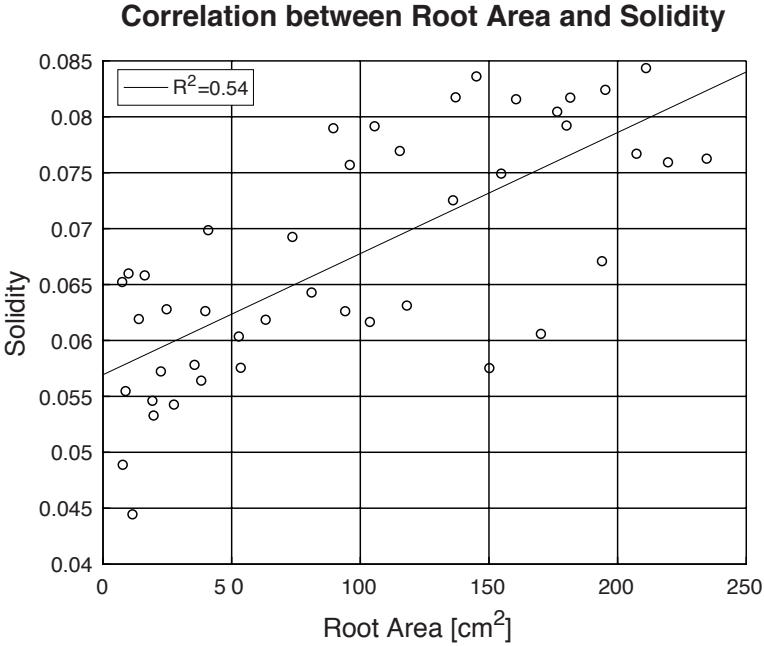

Supplemental Figure S3

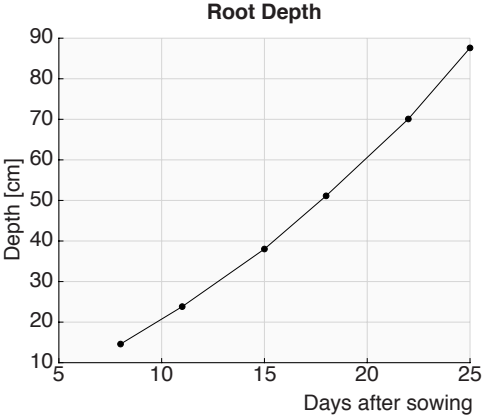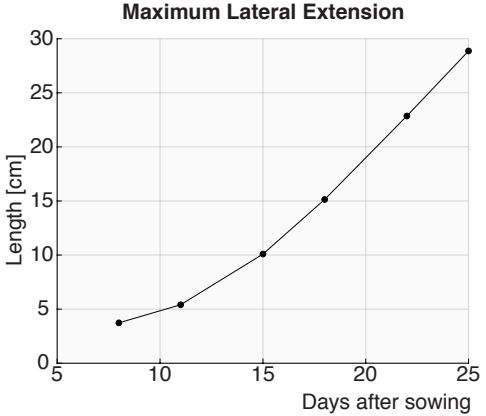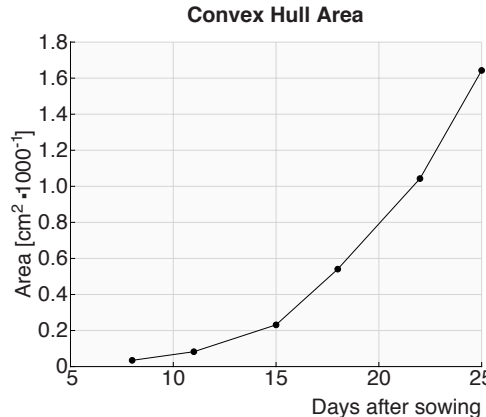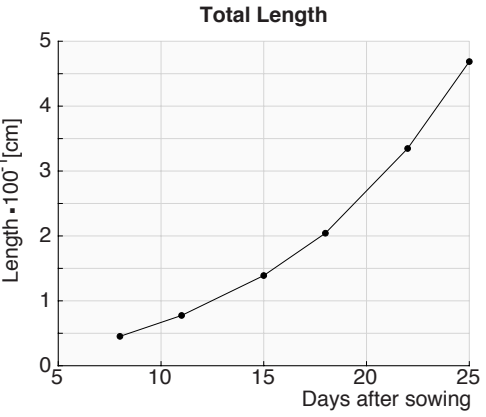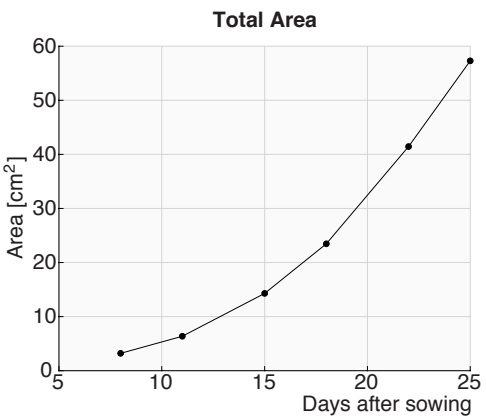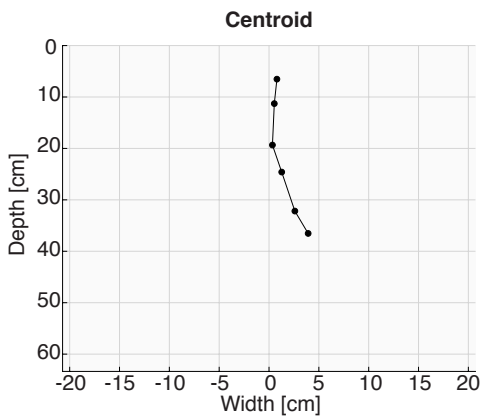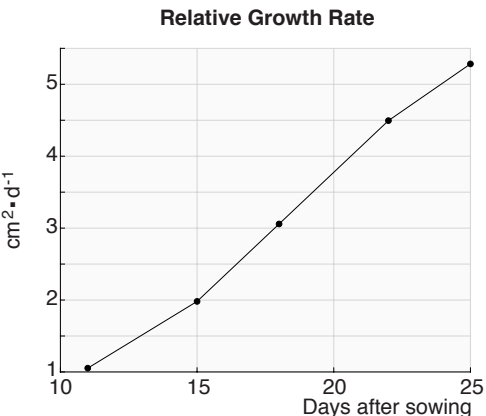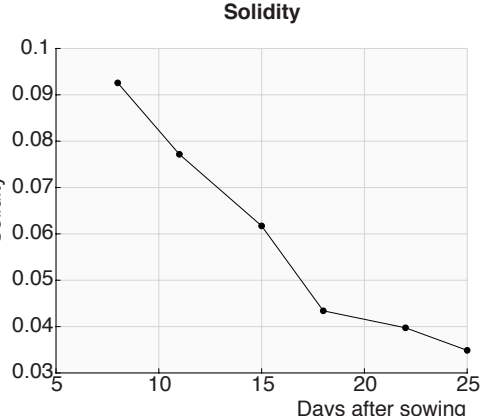

Supplemental Figure S4

**A**

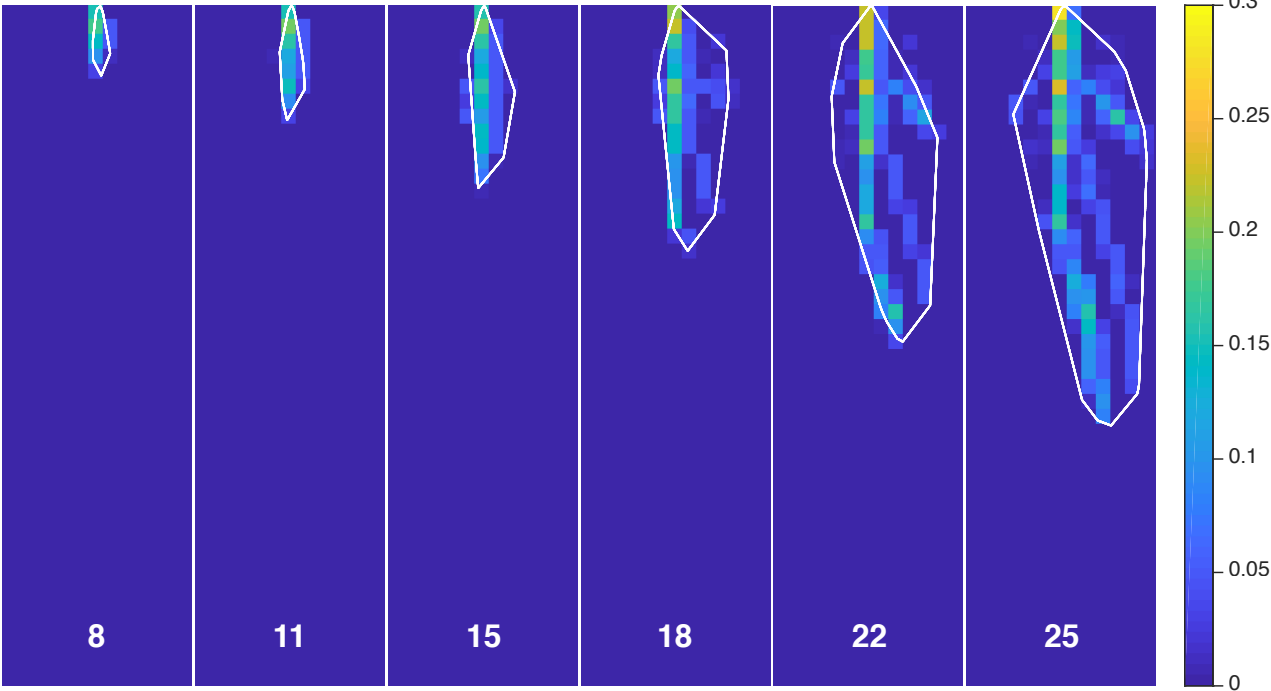

**B**

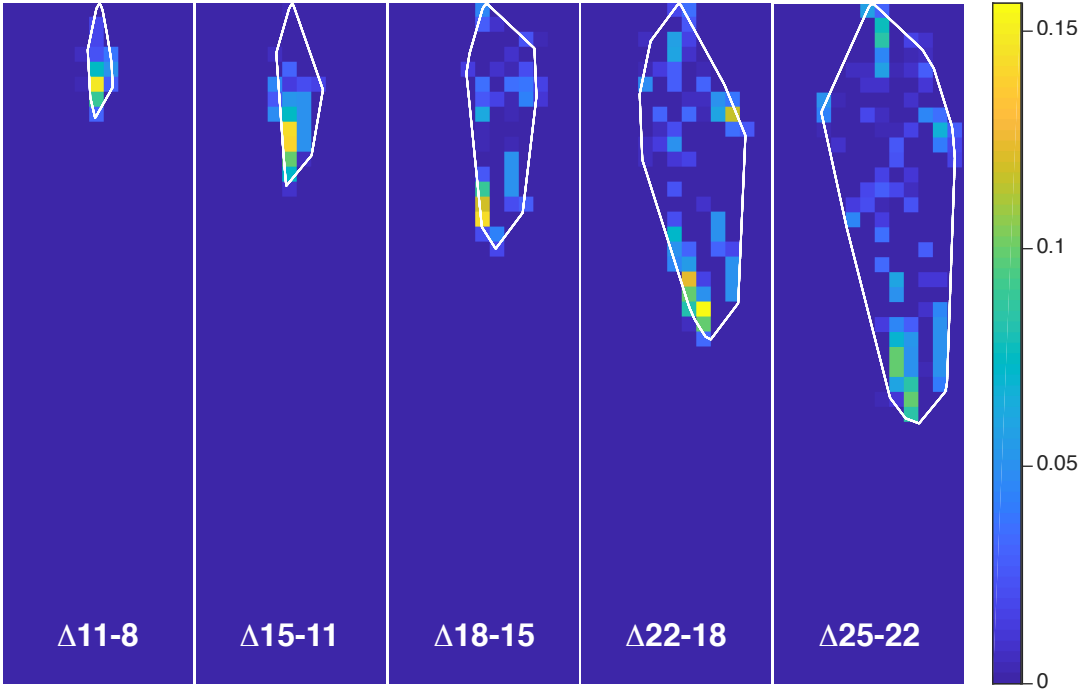

Supplemental Figure S5

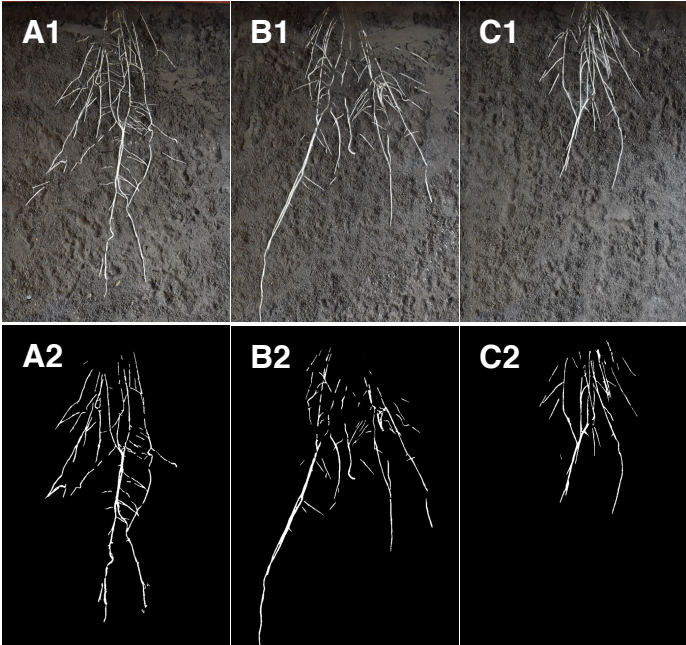

Supplemental Figure S6

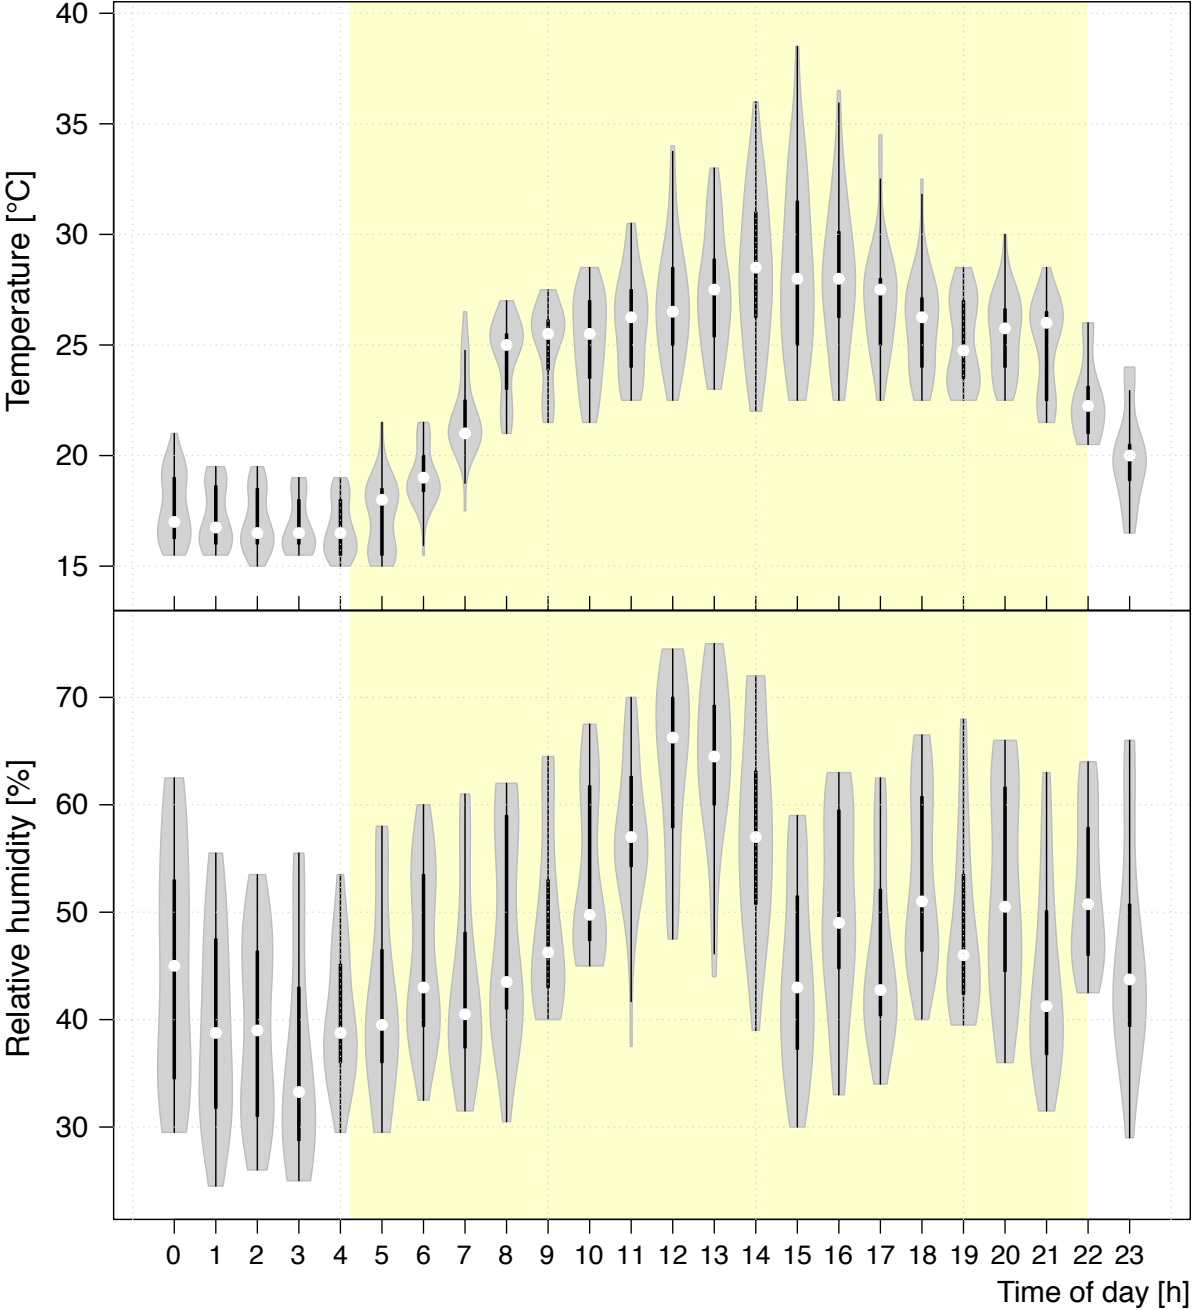

Supplemental Figure S7

**A**

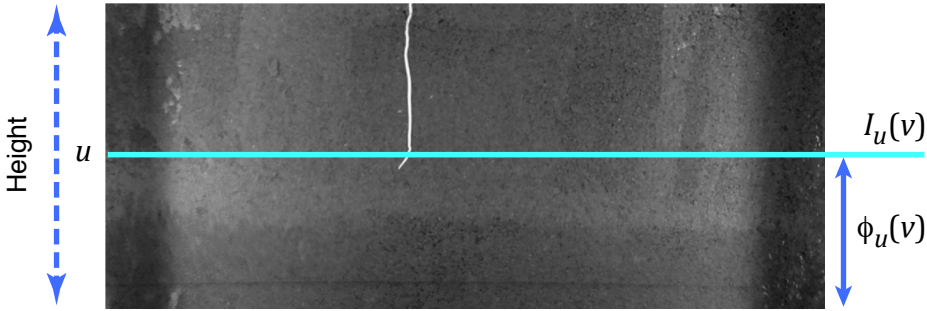

**B**

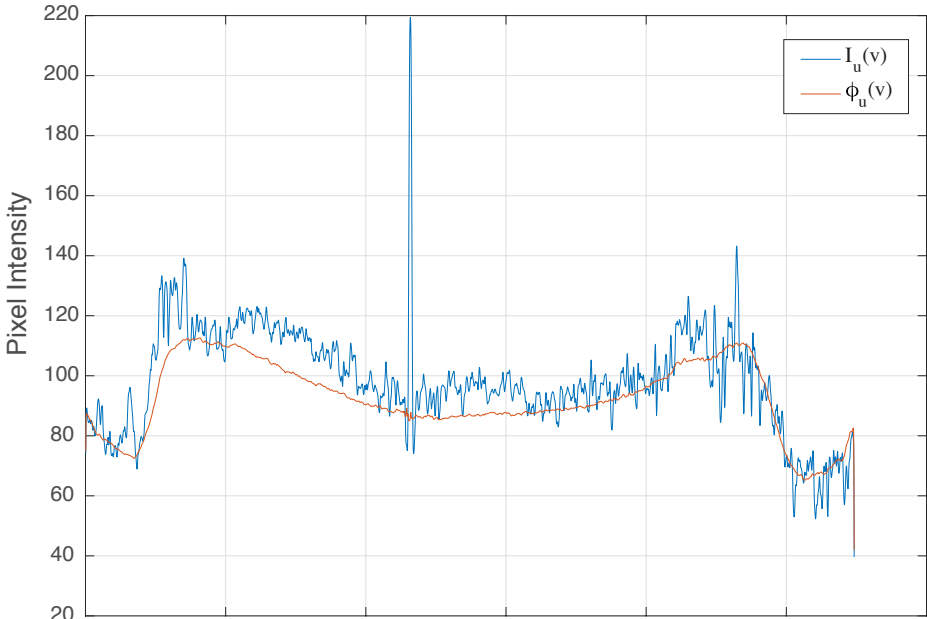

**C**

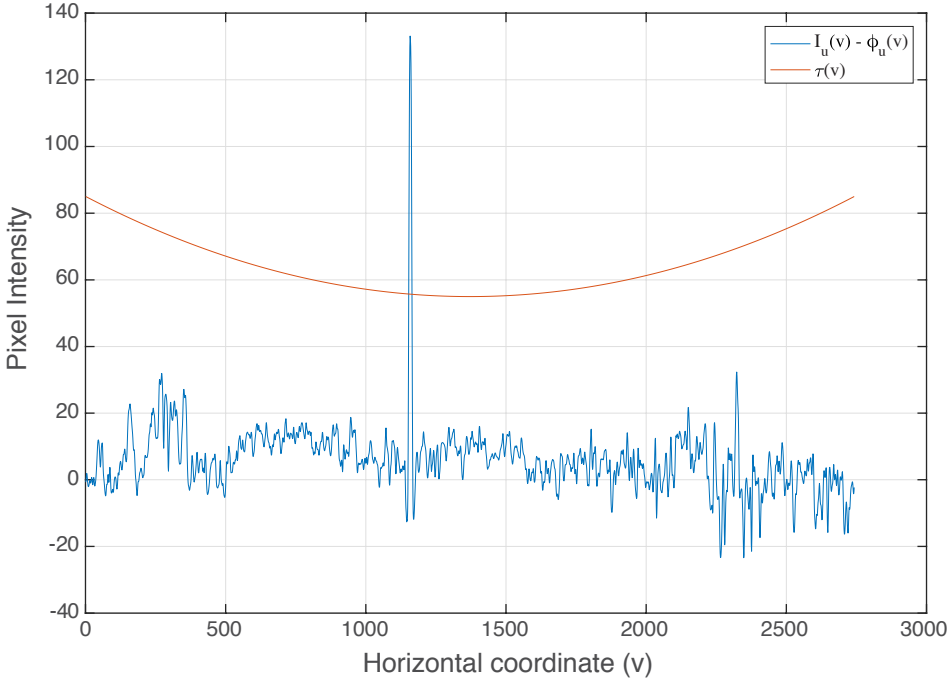

Supplement: Supplementary file [file media-2.pdf]
